# Supplementary material for: Gas Chromatography/Atmospheric Pressure Chemical Ionization-Fourier Transform Ion Cyclotron Resonance Mass Spectrometry of Pyrolysis Oil from German Brown Coal
Source: Hindawi journal article supplement (doi:10.1155/2016/5960916), 2016-01-01
Supplement: f1 [file 5960916.f1.pdf]

# SUPPLEMENTARY MATERIAL

## Gas Chromatography/Atmospheric Pressure Chemical Ionization-Fourier Transform Ion Cyclotron Resonance Mass Spectrometry of a Pyrolysis Oil from German Brown Coal

Jan Zuber<sup>†</sup>, Marius M. Kroll<sup>†</sup>, Philipp Rath sack<sup>†,¶</sup>, Matthias Otto<sup>†</sup>

<sup>†</sup>*Institute of Analytical Chemistry, TU Bergakademie Freiberg, 09599 Freiberg, Germany*

<sup>¶</sup>*German Centre for Energy Resources, Reiche Zeche, Fuchsmuehlenweg 9, 09599 Freiberg, Germany*

### Abstract

A pyrolysis oil from the slow pyrolysis of a German brown coal from Schöningen, obtained at a temperature of 500 °C, was separated and analyzed using a hyphenation of gas chromatography with an atmospheric pressure chemical ionization source operated in negative ion mode and Fourier transform ion cyclotron resonance mass spectrometry (GC-APCI-FT-ICR-MS). Development of this ultra-high-resolving analysis method is described, i.e. optimization of specific GC and APCI parameters and performed data processing. The advantages of GC-APCI-FT-ICR-MS hyphenation, e.g. soft ionization, ultra-high-resolving detection and most important isomer separation, were demonstrated for the sample liquid. For instance, it was possible to separate and identify nine different propylphenol, ethyldimethylphenol and trimethylphenol isomers. Furthermore, homologous series of different acids, e.g. alkyl and alkylene carboxylic acids, were verified, as well as homologous series of alkyl phenols, alkyl dihydroxy benzenes and alkoxy alkyl phenols.

Keywords: coal, pyrolysis oil, FT-ICR-MS, APCI, GC-MS

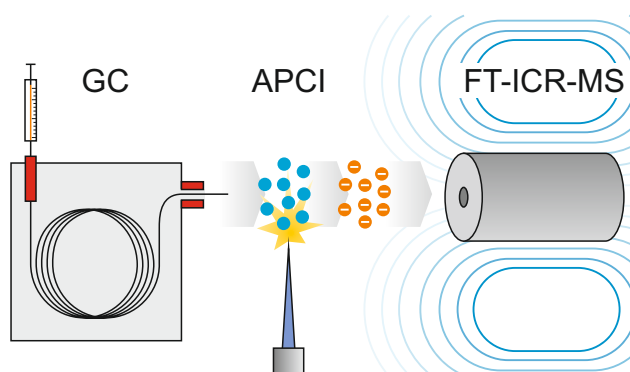

## Contents

|                                                                                                             |           |
|-------------------------------------------------------------------------------------------------------------|-----------|
| <b>S1. Composition of the RMSC . . . . .</b>                                                                | <b>3</b>  |
| <b>S2. Calibration of GC-APCI-FT-ICR-MS analyses . . . . .</b>                                              | <b>4</b>  |
| <b>S3. Data processing of GC-APCI-FT-ICR-MS analyses . . . . .</b>                                          | <b>5</b>  |
| <b>S4. Compound assignment of alkyl phenols, alkyl dihydroxy phenols and alkoxy alkyl phenols . . . . .</b> | <b>8</b>  |
| <b>S5. Time-separated <math>n_C</math>-DBE-plots . . . . .</b>                                              | <b>12</b> |

## List of Figures

|                                                                                           |    |
|-------------------------------------------------------------------------------------------|----|
| FigureS1. Interface of the developed data processing and calibration tool. . . . .        | 5  |
| FigureS2. Data structure of received peak lists. . . . .                                  | 6  |
| FigureS3. Data structure of obtained molecular formula lists. . . . .                     | 7  |
| FigureS4. $n_C$ -DBE- $t$ -plots of different time segments and compound classes. . . . . | 13 |

## List of Tables

|                                                                                                                                               |    |
|-----------------------------------------------------------------------------------------------------------------------------------------------|----|
| TableS1. Reference compounds of the RMSC. . . . .                                                                                             | 3  |
| TableS2. Calibration list for GC-APCI-FT-ICR-MS analyses. . . . .                                                                             | 4  |
| TableS3. Assigned compounds for alkyl phenols. . . . .                                                                                        | 9  |
| TableS4. Assigned compounds for alkyl dihydroxy benzenes and alkoxy alkyl phenols. . . . .                                                    | 10 |
| TableS5. Calculated ( $m/z$ ) errors (mean values) for assigned compound groups of alkyl phenols. . . . .                                     | 10 |
| TableS6. Calculated ( $m/z$ ) errors (mean values) for assigned compound groups of alkyl dihydroxy benzenes and alkoxy alkyl phenols. . . . . | 11 |

## S1. Composition of the RMSC

Table S1. Reference compounds of the RMSC.

| Reference compound                 | Molecular formula                              | Monoisotopic neutral mass [Da] |
|------------------------------------|------------------------------------------------|--------------------------------|
| Benzene                            | C <sub>6</sub> H <sub>6</sub>                  | 78.046950                      |
| 2-Cyclopenten-1-one                | C <sub>5</sub> H <sub>6</sub> O                | 82.041865                      |
| (5 <i>H</i> )-Furan-2-one          | C <sub>4</sub> H <sub>4</sub> O <sub>2</sub>   | 84.021129                      |
| Cyclopentanone                     | C <sub>5</sub> H <sub>8</sub> O                | 84.057515                      |
| Toluene                            | C <sub>7</sub> H <sub>8</sub>                  | 92.062600                      |
| Phenol                             | C <sub>6</sub> H <sub>6</sub> O                | 94.041865                      |
| Furfural                           | C <sub>5</sub> H <sub>4</sub> O <sub>2</sub>   | 96.021129                      |
| 2-Methyl-2-cyclopenten-1-one       | C <sub>6</sub> H <sub>8</sub> O                | 96.057515                      |
| 3-Methyl-2-cyclopenten-1-one       |                                                |                                |
| 2-Methylthiophene                  | C <sub>5</sub> H <sub>6</sub> S                | 98.019021                      |
| 3-Methylthiophene                  |                                                |                                |
| 2-Furfuryl alcohol                 | C <sub>5</sub> H <sub>6</sub> O <sub>2</sub>   | 98.036779                      |
| Styrene                            | C <sub>8</sub> H <sub>8</sub>                  | 104.062600                     |
| 1,2-Dimethylbenzene                | C <sub>8</sub> H <sub>10</sub>                 | 106.078250                     |
| 1,4-Dimethylbenzene                |                                                |                                |
| Ethylbenzene                       |                                                |                                |
| <i>o</i> -Cresol                   | C <sub>7</sub> H <sub>8</sub> O                | 108.057515                     |
| <i>m</i> -Cresol                   |                                                |                                |
| 2-Acetylfurane                     | C <sub>6</sub> H <sub>6</sub> O <sub>2</sub>   | 110.036779                     |
| Catechol                           |                                                |                                |
| Hydroquinone                       |                                                |                                |
| 2,3-Dimethyl-2-cyclopenten-1-one   | C <sub>7</sub> H <sub>10</sub> O               | 110.073165                     |
| 2-Ethylthiophene                   | C <sub>6</sub> H <sub>8</sub> S                | 112.034671                     |
| Indene                             | C <sub>9</sub> H <sub>8</sub>                  | 116.062600                     |
| Benzofurane                        | C <sub>8</sub> H <sub>6</sub> O                | 118.041865                     |
| 2,5-Dimethylphenol                 | C <sub>8</sub> H <sub>10</sub> O               | 122.073165                     |
| 2,6-Dimethylphenol                 |                                                |                                |
| 3,5-Dimethylphenol                 |                                                |                                |
| 2-Ethylphenol                      |                                                |                                |
| 3-Ethylphenol                      |                                                |                                |
| 4-Ethylphenol                      |                                                |                                |
| 3-Methylcatechol                   | C <sub>7</sub> H <sub>8</sub> O <sub>2</sub>   | 124.052429                     |
| 4-Methylcatechol                   |                                                |                                |
| 2-Methylhydroquinone               |                                                |                                |
| Guaiacol                           |                                                |                                |
| Mequinol                           | C <sub>10</sub> H <sub>8</sub>                 | 128.062600                     |
| Naphthalene                        |                                                |                                |
| Benzo/ <i>b</i> /thiophene         | C <sub>8</sub> H <sub>6</sub> S                | 134.019021                     |
| 4-Methylguaiacol                   | C <sub>8</sub> H <sub>10</sub> O <sub>2</sub>  | 138.068080                     |
| 1-Methylnaphthalene                | C <sub>11</sub> H <sub>10</sub>                | 142.078250                     |
| 2-Methylnaphthalene                |                                                |                                |
| 2-Methylbenzo/ <i>b</i> /thiophene | C <sub>9</sub> H <sub>8</sub> S                | 148.034671                     |
| 3-Methylbenzo/ <i>b</i> /thiophene |                                                |                                |
| Vanillin                           | C <sub>8</sub> H <sub>8</sub> O <sub>3</sub>   | 152.047344                     |
| 4-Ethylguaiacol                    | C <sub>9</sub> H <sub>12</sub> O <sub>2</sub>  | 152.083730                     |
| Syringol                           | C <sub>8</sub> H <sub>10</sub> O <sub>3</sub>  | 154.062994                     |
| Isoeugenol ( <i>cis</i> )          | C <sub>10</sub> H <sub>12</sub> O <sub>2</sub> | 164.083730                     |
| Isoeugenol ( <i>trans</i> )        |                                                |                                |
| Eugenol                            |                                                |                                |
| 4-Propylguaiacol                   | C <sub>10</sub> H <sub>14</sub> O <sub>2</sub> | 166.099380                     |

## S2. Calibration of GC-APCI-FT-ICR-MS analyses

Table S2 shows the molecules and their individual ( $m/z$ )-ratios, used for calibration of GC-APCI-FT-ICR-MS single mass spectra.

Table S2. Calibration list for GC-APCI-FT-ICR-MS analyses. Presumably, each compound can be detected as  $[M - H]^-$  molecular ion.

| Molecular formula | ( $m/z$ ) calculated | Assigned compound                             |
|-------------------|----------------------|-----------------------------------------------|
| $C_2F_3O_2$       | 112.985587           | Trifluoroacetic acid (TFA)                    |
| $C_6H_{11}O_3$    | 131.071368           | Polyethylene glycol (PEG) trimer              |
| $C_3F_7$          | 168.989371           | Decarboxylated heptafluorobutyric acid (HFBA) |
| $C_4F_7O_2$       | 212.979200           | HFBA                                          |
| $C_{15}H_{23}O$   | 219.175439           | Butylated hydroxytoluene (BHT)                |
| $C_{15}H_{21}O_2$ | 233.154703           | 3,5-Di- <i>tert</i> -butylsalicylaldehyde     |
| $C_{16}H_{31}O_2$ | 255.232954           | Palmitic (Hexadecanoic) acid                  |
| $C_{18}H_{35}O_2$ | 283.264254           | Stearic (Octadecanoic) acid                   |

According to Table S2, molecular ions for data calibration were used, that descend from calibration compounds and from actual sample compounds. For instance  $C_2F_3O_2$ ,  $C_3F_7$  and  $C_4F_7O_2$  are ions, that can be affiliated to the liquid calibration standard solution. Furthermore,  $C_6H_{11}O_3$  refers to a PEG trimer, which elutes out of the GC along with the sample molecules. The installed SUPELCOWAX 10 capillary column has PEG bond as stationary phase. Therefore, the stationary phase is probably the source for this calibrant molecular ion.

Other ions, used for calibration, can be affiliated to the actual liquid oil sample. For example  $C_{15}H_{23}O$  refers to butylated hydroxytoluene (BHT), a compound normally used as THF stabilizer [43]. Hence, its discharge arises from the pyrolysis process, where gaseous and liquid pyrolysis products were trapped in cooled traps. One trap was filled with tetrahydrofuran (THF), thus, a discharge into the sample liquids was unavoidable. 3,5-Di-*tert*-butylsalicylaldehyde ( $C_{15}H_{21}O_2$ ) is most likely a product of BHT, that is formed over time out of the THF stabilizer. Formulas  $C_{16}H_{31}O_2$  and  $C_{18}H_{35}O_2$  can be assigned to palmitic (hexadecanoic) and stearic (octadecanoic) acid, compounds typically found in the pyrolysis oils, as shown in the main part of the paper.

### S3. Data processing of GC-APCI-FT-ICR-MS analyses

In the following figures, three different screen shots of the developed calibration and data processing tool and its resulting files are illustrated. Figure S1 displays the interface of the tool, Figure S2 the data structure of received peak lists and Figure S3 the data structure of obtained molecular formula lists.

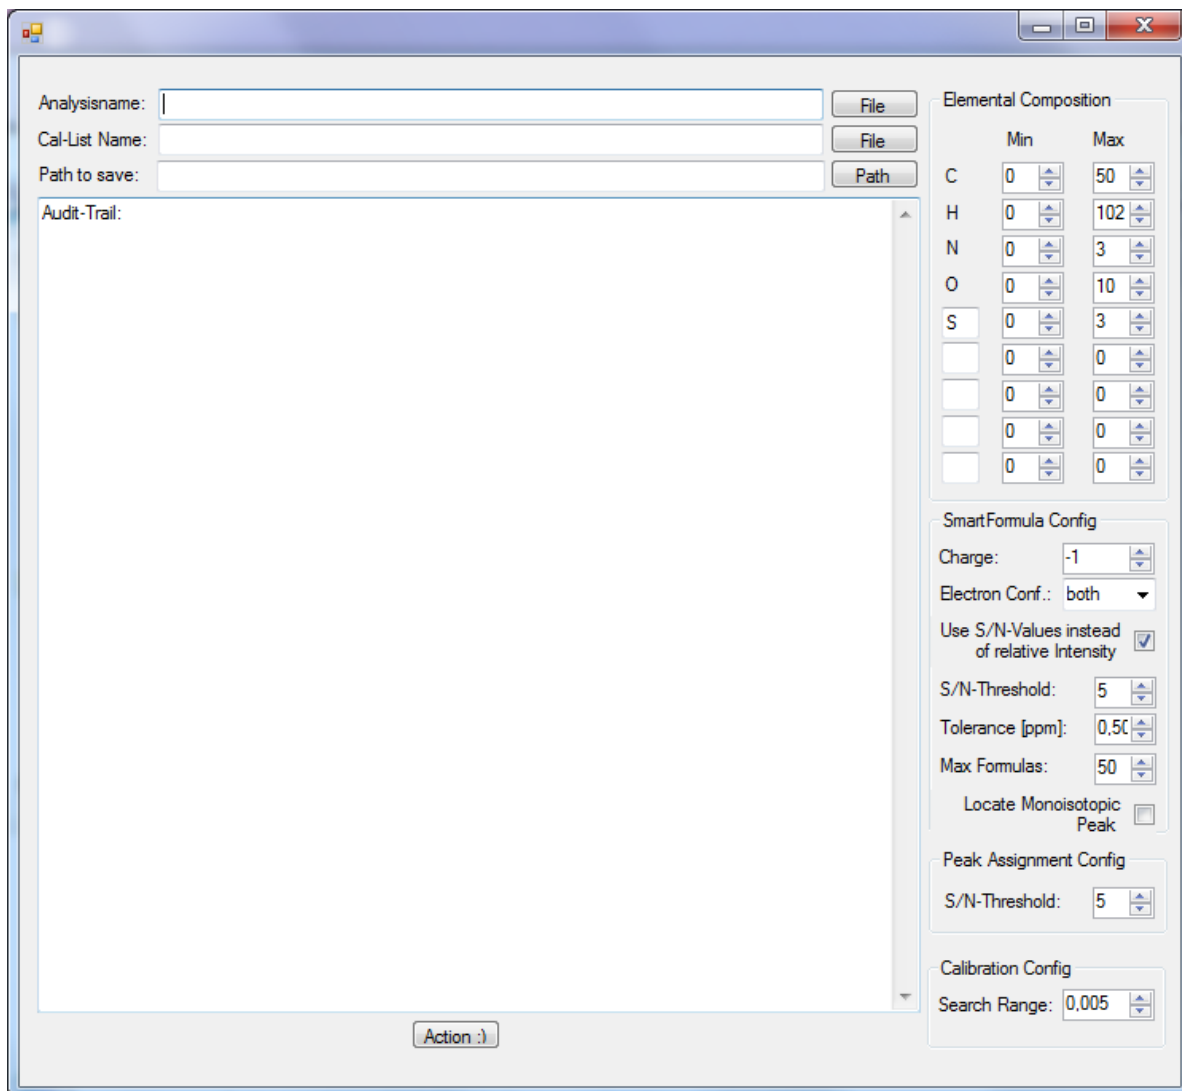

Figure S1. Interface of the developed data processing and calibration tool. Despite of some general settings, like adjustment of assumed numbers for C, H, N, O, S atoms and other elements (*Elemental Composition*) for the molecular formula prediction, it was possible to change more specific settings, e.g. presumed molecular ion charge (*Charge*), electron configuration (*Electron. Conf.*), *S/N* threshold (*S/N-Threshold*), (*m/z*) tolerance in ppm (*Tolerance [ppm]*) and maximum number of formulas (*Max. Formulas*). Furthermore, the search range (in ppm) for molecular ions used for data calibration (*Calibration Config. - Search Range*) can be adjusted. Resulting output files are presented in the following two figures.

| 00100_peak.csv |            |         |        |       |
|----------------|------------|---------|--------|-------|
| 1              | $m/z$      | $I$     | $Res.$ | $S/N$ |
| 2              | 95.787749  | 586926  | 306632 | 31.1  |
| 3              | 106.489713 | 589529  | 243461 | 31.2  |
| 4              | 112.985591 | 965392  | 265416 | 51.1  |
| 5              | 130.041086 | 116673  | 225368 | 6.2   |
| 6              | 133.040821 | 106699  | 251576 | 5.6   |
| 7              | 141.045889 | 118181  | 220718 | 6.3   |
| 8              | 142.041136 | 165553  | 232601 | 8.8   |
| 9              | 144.045543 | 101098  | 238242 | 5.4   |
| 10             | 144.056764 | 111435  | 220398 | 5.9   |
| 11             | 145.040786 | 113970  | 198014 | 6.0   |
| 12             | 149.108458 | 102213  | 194865 | 5.4   |
| 13             | 155.036413 | 141913  | 206238 | 7.5   |
| 14             | 155.061654 | 105941  | 179716 | 5.6   |
| 15             | 156.056762 | 170859  | 180285 | 9.0   |
| 16             | 157.052035 | 97692   | 222384 | 5.2   |
| 17             | 158.036068 | 100613  | 207202 | 5.3   |
| 18             | 159.056443 | 106380  | 207814 | 5.6   |
| 19             | 160.051700 | 120019  | 200494 | 6.4   |
| 20             | 162.982496 | 234161  | 175861 | 12.4  |
| 21             | 165.046046 | 99931   | 155379 | 5.3   |
| 22             | 166.041162 | 150826  | 177311 | 8.0   |
| 23             | 167.036324 | 112443  | 191953 | 6.0   |
| 24             | 168.056744 | 167940  | 199571 | 8.9   |
| 25             | 168.989401 | 2655317 | 172888 | 140.5 |
| 26             | 169.040903 | 124876  | 196375 | 6.6   |
| 27             | 169.052190 | 121542  | 136570 | 6.4   |
| 28             | 170.072445 | 142317  | 168664 | 7.5   |
| 29             | 171.056438 | 144864  | 179697 | 7.7   |
| 30             | 171.067778 | 110185  | 168675 | 5.8   |
| 31             | 172.051757 | 158493  | 175682 | 8.4   |
| 32             | 172.088173 | 101368  | 150386 | 5.4   |
| 33             | 173.108446 | 101178  | 192897 | 5.4   |
| 34             | 174.067408 | 115122  | 176481 | 6.1   |
| 35             | 174.128960 | 203959  | 158581 | 10.8  |

Figure S2. Data structure of received peak lists. For one time segment (here: 00100) all detected compounds with their individual ( $m/z$ )-ratio ( $m/z$ ), intensity ( $I$ ), resolution ( $Res.$ ) and their  $S/N$  are listed.

| 00100_sf.csv |                                                                                                                    |
|--------------|--------------------------------------------------------------------------------------------------------------------|
| 1            | mSigma;Observed Intens;Observed m/z;calc. m/z;err mDa;err ppm;sum formula;C;H;N;O;S;                               |
| 2            | 0.781735599040985;116673;130.041086;130.041071;-0.115006431937218;-0.88438535665455;C 7 H 4 N 3 ;7;4;3;0;0;        |
| 3            | -1;111435;144.056764;144.056721;-0.296615749597549;-2.05901994712051;C 8 H 6 N 3 ;8;6;3;0;0;                       |
| 4            | 0.772187173366547;102213;149.108458;149.108422;-0.242828786373138;-1.62853797350803;C 9 H 13 N 2 ;9;13;2;0;0;      |
| 5            | -1;170859;156.056762;156.056721;0.262199014425278;1.68015157793352;C 9 H 6 N 3 ;9;6;3;0;0;                         |
| 6            | -1;167940;168.056744;168.056721;0.139951229095459;0.832761753614808;C 10 H 6 N 3 ;10;6;3;0;0;                      |
| 7            | -1;101178;173.108446;173.108422;0.141242563724518;0.815919538390899;C 11 H 13 N 2 ;11;13;2;0;0;                    |
| 8            | -1;111052;177.066974;177.066951;0.129663705825806;0.7322862239112;C 9 H 9 N 2 O 2 ;9;9;2;2;0;                      |
| 9            | 0.760075867176056;449221;177.128537;177.128489;-0.270052969455719;-1.52461582233904;C 12 H 17 O 1 ;12;17;0;1;0;    |
| 10           | -1;108454;184.088038;184.088021;-0.0926244929432869;-0.50315324106153;C 11 H 10 N 3 ;11;10;3;0;0;                  |
| 11           | -1;178265;186.067299;186.067285;-0.0729145556688309;-0.391871951955175;C 10 H 8 N 3 O 1 ;10;8;3;1;0;               |
| 12           | -1;95539;189.066927;189.066951;-0.125679165124893;-0.66473373679252;C 10 H 9 N 2 O 2 ;10;9;2;2;0;                  |
| 13           | 0.761792778968811;103864;189.103381;189.103337;-0.234501749277115;-1.240071690273;C 11 H 13 N 2 O 1 ;11;13;2;1;0;  |
| 14           | -1;147447;196.088078;196.088021;-0.290449261665344;-1.48121836280074;C 12 H 10 N 3 ;12;10;3;0;0;                   |
| 15           | -1;104819;198.056028;198.056052;-0.12234391272068;-0.617723752461014;C 12 H 8 N 1 O 2 ;12;8;1;2;0;                 |
| 16           | 0.404416531324387;160286;198.067294;198.067285;0.0448347181081772;0.22636103681402;C 11 H 8 N 3 O 1 ;11;8;3;1;0;   |
| 17           | -1;179095;199.124074;199.124072;-0.00821307860314846;-0.0412460354506181;C 13 H 15 N 2 ;13;15;2;0;0;               |
| 18           | -1;99124;200.082927;200.082936;0.0442197732627392;0.221007229327096;C 11 H 10 N 3 O 1 ;11;10;3;1;0;                |
| 19           | -1;145967;201.139758;201.139722;0.179621890187263;0.893020314520222;C 13 H 17 N 2 ;13;17;2;0;0;                    |
| 20           | -1;186317;206.072411;206.072371;-0.193684577941895;-0.939886019792259;C 13 H 8 N 3 ;13;8;3;0;0;                    |
| 21           | -1;126054;208.051664;208.051635;0.136304780840874;0.655148718229007;C 12 H 6 N 3 O 1 ;12;6;3;1;0;                  |
| 22           | -1;142983;209.118314;209.118318;-0.0210807491093874;-0.100807761639611;C 12 H 17 O 3 ;12;17;0;3;0;                 |
| 23           | -1;121074;210.067271;210.067285;-0.0694272965192795;-0.330500302243406;C 12 H 8 N 3 O 1 ;12;8;3;1;0;               |
| 24           | -1;124715;211.087628;211.087687;-0.278684496879578;-1.32023131753345;C 13 H 11 N 2 O 1 ;13;11;2;1;0;               |
| 25           | -1;106032;212.082982;212.082936;-0.218894734978676;-1.03211833857369;C 12 H 10 N 3 O 1 ;12;10;3;1;0;               |
| 26           | -1;108250;212.119291;212.119321;0.142400398850441;0.671322246497539;C 13 H 14 N 3 ;13;14;3;0;0;                    |
| 27           | 0.210417628288269;214202;212.983768;212.983816;-0.224771603941917;-1.05534617117718;C 12 H 5 S 2 ;12;5;0;0;2;      |
| 28           | -1;125032;213.066956;213.066951;0.0251579098403454;0.118075135892752;C 12 H 9 N 2 O 2 ;12;9;2;2;0;                 |
| 29           | -1;105471;214.062258;214.0622;0.269672065973282;1.25978333931396;C 11 H 8 N 3 O 2 ;11;8;3;2;0;                     |
| 30           | -1;135985;214.135031;214.134971;-0.277444183826447;-1.29565061426599;C 13 H 16 N 3 ;13;16;3;0;0;                   |
| 31           | -1;105780;214.983462;214.983519;0.262972593307495;1.22322243190579;C 14 H 1 N 1 S 1 ;14;1;1;0;1;                   |
| 32           | -1;136613;215.118924;215.118987;-0.292231559753418;-1.35846514363541;C 13 H 15 N 2 O 1 ;13;15;2;1;0;               |
| 33           | 0.398084223270416;139575;216.114266;216.114236;0.142101913690567;0.657531388720266;C 12 H 14 N 3 O 1 ;12;14;3;1;0; |
| 34           | -1;170295;217.134622;217.134637;-0.0658299177885056;-0.303175592370303;C 13 H 17 N 2 O 1 ;13;17;2;1;0;             |
| 35           | -1;135582;218.072434;218.072371;0.291711330413818;1.33768090006141;C 14 H 8 N 3 ;14;8;3;0;0;                       |

Figure S3. Data structure of obtained molecular formula lists. Contained in this file is an information about the standard deviation (*mSigma*), observed signal intensity (*Observed Intens.*), observed (*m/z*)-ratio of the detected molecular ion (*Observed m/z*), theoretical calculated (*m/z*)-ratio (*calc. m/z*), mass error in mDa (*err mDa*), mass error in ppm (*err ppm*), the assigned molecular formula (*sum formula*) and the elements comprised in this molecular formula (here: *C, H, N, O, S*) in the time segment (here: *00100*).

## S4. Compound assignment of alkyl phenols, alkyl dihydroxy phenols and alkoxy alkyl phenols

In the following tables, an overview for allocated alkyl phenols (see Table S3) and alkyl dihydroxy benzenes/alkoxy alkyl phenols (see Table S4) is presented. Assigned compounds, according to the RMSC, are specified in these tables as well. Calculated ( $m/z$ ) errors varied in case of the alkyl phenols from 0.007 to 0.439 ppm (mean value: 0.088 ppm) and in case of the alkyl dihydroxy benzenes/alkoxy alkyl phenols from 0.000 to 0.471 ppm (mean value: 0.124 ppm). Hence, the applied assignment of observed ( $m/z$ )-ratios to the described oil compounds is most accurate for the alkyl phenols, but also relatively accurate for the alkyl dihydroxy benzenes/alkoxy alkyl phenols.

Furthermore, described ( $m/z$ ) error ranges and mean values for each individual compound group of alkyl phenols and alkyl dihydroxy benzenes/alkoxy alkyl phenols are listed in Table S5 and Table S6. According to the results presented, compound assignment of heptyl phenols (and isomers) is most precise in the compound class of alkyl phenols. Compared to that, compound assignment of dihydroxy tetramethyl benzenes (and isomers) is most accurate in compound class alkyl dihydroxy benzenes/alkoxy alkyl phenols. Notable in compound class alkyl dihydroxy benzenes/alkoxy alkyl phenols, is the exact assignment of two compounds of dihydroxy dimethyl benzenes (and isomers), comparing observed and calculated ( $m/z$ ) errors.



TableS3. Assigned compounds for alkyl phenols. Presumably, each supposed compound is present as  $[M - H]^-$  molecular ion. Hence, calculated and observed ( $m/z$ )-ratios are presented in Da.

| Assigned compound class           | Assigned compound  | No.      | Retention time<br>$t_R$<br>[min] | $(m/z)$            |                  | $(m/z)$        |                |
|-----------------------------------|--------------------|----------|----------------------------------|--------------------|------------------|----------------|----------------|
|                                   |                    |          |                                  | calculated<br>[Da] | observed<br>[Da] | error<br>[mDa] | error<br>[ppm] |
| Phenols                           | Phenol             | <b>a</b> | $20.38 \pm 0.08$                 | 93.034588          | 93.034599        | 0.011          | 0.118          |
| Methyl phenols                    | <i>o</i> -Cresol   | <b>b</b> | $20.25 \pm 0.05$                 | 107.050238         | 107.050246       | 0.008          | 0.075          |
|                                   | <i>m</i> -Cresol   | <b>c</b> | $22.09 \pm 0.05$                 | 107.050238         | 107.050240       | 0.002          | 0.019          |
| Dimethyl phenols (and isomers)    | 2,6-Dimethylphenol | <b>d</b> | $18.47 \pm 0.05$                 | 121.065888         | 121.065895       | 0.007          | 0.058          |
|                                   | 2-Ethylphenol      | <b>e</b> | $21.95 \pm 0.07$                 | 121.065888         | 121.065876       | 0.012          | 0.099          |
|                                   |                    |          | $23.34 \pm 0.04$                 | 121.065888         | 121.065892       | 0.004          | 0.033          |
|                                   |                    |          | $23.94 \pm 0.05$                 | 121.065888         | 121.065853       | 0.035          | 0.289          |
|                                   |                    |          | $24.80 \pm 0.08$                 | 121.065888         | 121.065899       | 0.011          | 0.091          |
| Trimethyl phenols (and isomers)   |                    |          | $19.41 \pm 0.05$                 | 135.081539         | 135.081549       | 0.010          | 0.074          |
|                                   |                    |          | $21.29 \pm 0.07$                 | 135.081539         | 135.081552       | 0.013          | 0.096          |
|                                   |                    |          | $22.65 \pm 0.06$                 | 135.081539         | 135.081553       | 0.014          | 0.104          |
|                                   |                    |          | $23.23 \pm 0.06$                 | 135.081539         | 135.081543       | 0.004          | 0.030          |
|                                   |                    |          | $23.73 \pm 0.05$                 | 135.081539         | 135.081544       | 0.005          | 0.037          |
|                                   |                    |          | $24.94 \pm 0.05$                 | 135.081539         | 135.081544       | 0.005          | 0.037          |
|                                   |                    |          | $25.72 \pm 0.07$                 | 135.081539         | 135.081521       | 0.018          | 0.133          |
|                                   |                    |          | $26.41 \pm 0.05$                 | 135.081539         | 135.081545       | 0.006          | 0.044          |
| Tetramethyl phenols (and isomers) |                    |          | $27.77 \pm 0.07$                 | 135.081539         | 135.081535       | 0.004          | 0.030          |
|                                   |                    |          | $20.09 \pm 0.04$                 | 149.097189         | 149.097190       | 0.001          | 0.007          |
|                                   |                    |          | $20.70 \pm 0.05$                 | 149.097189         | 149.097163       | 0.026          | 0.174          |
|                                   |                    |          | $21.24 \pm 0.12$                 | 149.097189         | 149.097188       | 0.001          | 0.007          |
|                                   |                    |          | $22.27 \pm 0.07$                 | 149.097189         | 149.097200       | 0.011          | 0.074          |
|                                   |                    |          | $22.78 \pm 0.05$                 | 149.097189         | 149.097174       | 0.015          | 0.101          |
|                                   |                    |          | $23.49 \pm 0.07$                 | 149.097189         | 149.097173       | 0.016          | 0.107          |
|                                   |                    |          | $24.10 \pm 0.08$                 | 149.097189         | 149.097186       | 0.003          | 0.020          |
|                                   |                    |          | $24.76 \pm 0.09$                 | 149.097189         | 149.097195       | 0.006          | 0.040          |
|                                   |                    |          | $25.38 \pm 0.13$                 | 149.097189         | 149.097199       | 0.010          | 0.067          |
|                                   |                    |          | $26.57 \pm 0.04$                 | 149.097189         | 149.097174       | 0.015          | 0.101          |
| Pentamethyl phenols (and isomers) |                    |          | $27.25 \pm 0.03$                 | 149.097189         | 149.097181       | 0.008          | 0.054          |
|                                   |                    |          | $28.09 \pm 0.11$                 | 149.097189         | 149.097193       | 0.004          | 0.027          |
|                                   |                    |          | $29.23 \pm 0.03$                 | 149.097189         | 149.097197       | 0.008          | 0.054          |
|                                   |                    |          | $22.81 \pm 0.11$                 | 163.112839         | 163.112864       | 0.025          | 0.153          |
|                                   |                    |          | $23.63 \pm 0.08$                 | 163.112839         | 163.112816       | 0.023          | 0.141          |
|                                   |                    |          | $24.56 \pm 0.11$                 | 163.112839         | 163.112819       | 0.020          | 0.123          |
|                                   |                    |          | $25.27 \pm 0.09$                 | 163.112839         | 163.112813       | 0.026          | 0.159          |
|                                   |                    |          | $25.95 \pm 0.11$                 | 163.112839         | 163.112828       | 0.011          | 0.067          |
| Hexyl phenols (and isomers)       |                    |          | $27.77 \pm 0.07$                 | 163.112839         | 163.112819       | 0.020          | 0.123          |
|                                   |                    |          | $28.84 \pm 0.05$                 | 163.112839         | 163.112858       | 0.019          | 0.116          |
|                                   |                    |          | $30.50 \pm 0.15$                 | 163.112839         | 163.112823       | 0.016          | 0.098          |
|                                   |                    |          | $26.79 \pm 0.04$                 | 177.128489         | 177.128479       | 0.010          | 0.056          |
|                                   |                    |          | $27.77 \pm 0.07$                 | 177.128489         | 177.128505       | 0.016          | 0.090          |
| Heptyl phenols (and isomers)      |                    |          | $29.56 \pm 0.07$                 | 177.128489         | 177.128492       | 0.003          | 0.017          |
|                                   |                    |          | $29.87 \pm 0.04$                 | 177.128489         | 177.128497       | 0.008          | 0.045          |
|                                   |                    |          | $30.57 \pm 0.13$                 | 177.128489         | 177.128499       | 0.010          | 0.056          |
|                                   |                    |          | $30.01 \pm 0.13$                 | 191.144139         | 191.144133       | 0.006          | 0.031          |
| Octyl phenols (and isomers)       |                    |          | $30.56 \pm 0.10$                 | 191.144139         | 191.144147       | 0.008          | 0.042          |
|                                   |                    |          | $32.12 \pm 0.07$                 | 191.144139         | 191.144146       | 0.007          | 0.037          |
|                                   |                    |          | $32.44 \pm 0.04$                 | 191.144139         | 191.144131       | 0.008          | 0.042          |
|                                   |                    |          | $27.01 \pm 0.09$                 | 205.159789         | 205.159740       | 0.049          | 0.239          |
|                                   |                    |          | $33.72 \pm 0.16$                 | 205.159789         | 205.159759       | 0.030          | 0.146          |
|                                   |                    |          | $33.96 \pm 0.11$                 | 205.159789         | 205.159699       | 0.090          | 0.439          |

Table S4. Assigned compounds for alkyl dihydroxy benzenes and alkoxy alkyl phenols. Most likely, each supposed compound is present as  $[M - H]^-$  molecular ion as well.

| Assigned compound class                      | Assigned compound    | No. | Retention time   | $(m/z)$            |                  | $(m/z)$        |                |
|----------------------------------------------|----------------------|-----|------------------|--------------------|------------------|----------------|----------------|
|                                              |                      |     | $t_R$<br>[min]   | calculated<br>[Da] | observed<br>[Da] | error<br>[mDa] | error<br>[ppm] |
| Dihydroxy benzenes                           | Hydroquinone         | f   | $20.35 \pm 0.08$ | 109.029503         | 109.029519       | 0.016          | 0.147          |
|                                              |                      |     | $34.60 \pm 0.12$ | 109.029503         | 109.029458       | 0.045          | 0.413          |
| Dihydroxy methyl benzenes (and isomers)      | Guaiacol             | g   | $17.44 \pm 0.02$ | 123.045153         | 123.045167       | 0.014          | 0.114          |
|                                              | 4-Methylcatechol     | h   | $22.11 \pm 0.05$ | 123.045153         | 123.045154       | 0.001          | 0.008          |
|                                              |                      |     | $33.86 \pm 0.11$ | 123.045153         | 123.045095       | 0.058          | 0.471          |
|                                              | 2-Methylhydroquinone | i   | $37.19 \pm 0.12$ | 123.045153         | 123.045101       | 0.052          | 0.423          |
|                                              | 4-Methylguaiacol     | j   | $19.53 \pm 0.10$ | 137.060803         | 137.060803       | 0.000          | 0.000          |
| Dihydroxy dimethyl benzenes (and isomers)    |                      |     | $21.94 \pm 0.08$ | 137.060803         | 137.060796       | 0.007          | 0.051          |
|                                              |                      |     | $23.88 \pm 0.09$ | 137.060803         | 137.060803       | 0.000          | 0.000          |
|                                              |                      |     | $32.69 \pm 0.10$ | 137.060803         | 137.060795       | 0.008          | 0.058          |
|                                              |                      |     | $36.28 \pm 0.12$ | 137.060803         | 137.060776       | 0.027          | 0.197          |
|                                              |                      |     | $41.22 \pm 0.05$ | 137.060803         | 137.060767       | 0.036          | 0.263          |
|                                              |                      |     |                  |                    |                  |                |                |
| Dihydroxy trimethyl benzenes (and isomers)   | 4-Ethylguaiacol      | k   | $21.05 \pm 0.08$ | 151.076453         | 151.076451       | 0.002          | 0.013          |
|                                              |                      |     | $23.22 \pm 0.09$ | 151.076453         | 151.076438       | 0.015          | 0.099          |
|                                              |                      |     | $23.77 \pm 0.08$ | 151.076453         | 151.076432       | 0.021          | 0.139          |
|                                              |                      |     | $24.82 \pm 0.08$ | 151.076453         | 151.076434       | 0.019          | 0.126          |
|                                              |                      |     | $25.76 \pm 0.18$ | 151.076453         | 151.076471       | 0.018          | 0.119          |
|                                              |                      |     | $33.94 \pm 0.16$ | 151.076453         | 151.076458       | 0.005          | 0.033          |
|                                              |                      |     | $40.05 \pm 0.05$ | 151.076453         | 151.076460       | 0.007          | 0.046          |
|                                              |                      |     | $46.45 \pm 0.13$ | 151.076453         | 151.076442       | 0.011          | 0.073          |
| Dihydroxy tetramethyl benzenes (and isomers) | 4-Propylguaiacol     | l   | $22.70 \pm 0.13$ | 165.092103         | 165.092093       | 0.010          | 0.061          |
|                                              |                      |     | $34.30 \pm 0.17$ | 165.092103         | 165.092092       | 0.011          | 0.067          |
|                                              |                      |     | $36.32 \pm 0.12$ | 165.092103         | 165.092102       | 0.001          | 0.006          |
|                                              |                      |     | $42.46 \pm 0.08$ | 165.092103         | 165.092094       | 0.009          | 0.055          |

Table S5. Calculated  $(m/z)$  errors (mean values) for assigned compound groups of alkyl phenols.

| Assigned compound class           | $(m/z)$ error (mean value) | $(m/z)$ error (mean value) |
|-----------------------------------|----------------------------|----------------------------|
|                                   | [mDa]                      | [ppm]                      |
| Phenol                            | 0.011                      | 0.118                      |
| Methyl phenols                    | 0.005                      | 0.047                      |
| Dimethyl phenols (and isomers)    | 0.014                      | 0.114                      |
| Trimethyl phenols (and isomers)   | 0.009                      | 0.065                      |
| Tetramethyl phenols (and isomers) | 0.010                      | 0.064                      |
| Pentamethyl phenols (and isomers) | 0.020                      | 0.123                      |
| Hexyl phenols (and isomers)       | 0.009                      | 0.053                      |
| Heptyl phenols (and isomers)      | 0.007                      | 0.038                      |
| Octyl phenols (and isomers)       | 0.056                      | 0.275                      |
| <b>Average</b>                    | <b>0.014</b>               | <b>0.088</b>               |

Table S6. Calculated ( $m/z$ ) errors (mean values) for assigned compound groups of alkyl dihydroxy benzenes and alkoxy alkyl phenols.

| Assigned<br>compound class                   | ( $m/z$ ) error (mean value)<br>[mDa] | ( $m/z$ ) error (mean value)<br>[ppm] |
|----------------------------------------------|---------------------------------------|---------------------------------------|
| Dihydroxy benzenes                           | 0.030                                 | 0.280                                 |
| Dihydroxy methyl benzenes (and isomers)      | 0.031                                 | 0.254                                 |
| Dihydroxy dimethyl benzenes (and isomers)    | 0.013                                 | 0.095                                 |
| Dihydroxy trimethyl benzenes (and isomers)   | 0.012                                 | 0.081                                 |
| Dihydroxy tetramethyl benzenes (and isomers) | 0.008                                 | 0.047                                 |
| <b>Average</b>                               | <b>0.016</b>                          | <b>0.124</b>                          |

## S5. Time-separated $n_C$ - $DBE$ -plots

In Figure S4, the  $n_C$ - $DBE$ - $t$ -plots of all evaluated compound classes of liquid sample S500 are presented, color-coded to the relative intensity (yellow - low intensity, red - medium intensity, black - high intensity). Interpretation of these plots for classes  $C_6H_8O_1$ ,  $C_6H_8O_2$ ,  $C_6H_8O_4$  and  $C_6H_8O_2S_1$  was conducted in the section "Results and Discussion" of the paper. Other classes, that were not evaluated in the main part of the paper, will be analyzed hereafter.

First compound class to evaluate is compound class  $C_6H_8O_3$ . In this compound class, increasing  $n_C$  and/or  $DBE$  values with advancing analysis time were not noticed. Compounds of lower  $DBE$  as well as compounds of higher  $DBE$  were detected throughout the analysis. In compound class  $C_6H_8O_5$ , a decrease of observed  $n_C$  as well as  $DBE$  values with advancing analysis time was obvious. Therefore, presumably oxygen-functionalized benzene derivatives with  $DBE$  values between 4 and 7 mainly eluted in a time range of 10 - 40 min.

The time-depending  $n_C$ - $DBE$ -plot of sulphur-containing compound class  $C_6H_8S_1$  expressed a time-dependent elution and thus detection of supposed cycloalkane substituted thiophenes ( $DBE = 4$ ) and benzothiophenes ( $DBE = 7$ ). More precisely, presumed thiophenic compounds were detected in a time range of 10 - 30 min and benzothiophenic compounds between 30 and 50 min. In comparison, presumed hydroxy functionalized thiophenes and benzothiophenes with bonded cycloalkanes ( $DBE = 4$  and  $DBE = 7$ ) were detected in class  $C_6H_8O_1S_1$  in a time range between 10 and 40 min and 20 - 60 min. In general, an increase of  $n_C$  and  $DBE$  values was noticed in this compound class, especially between 10 and 60 min.

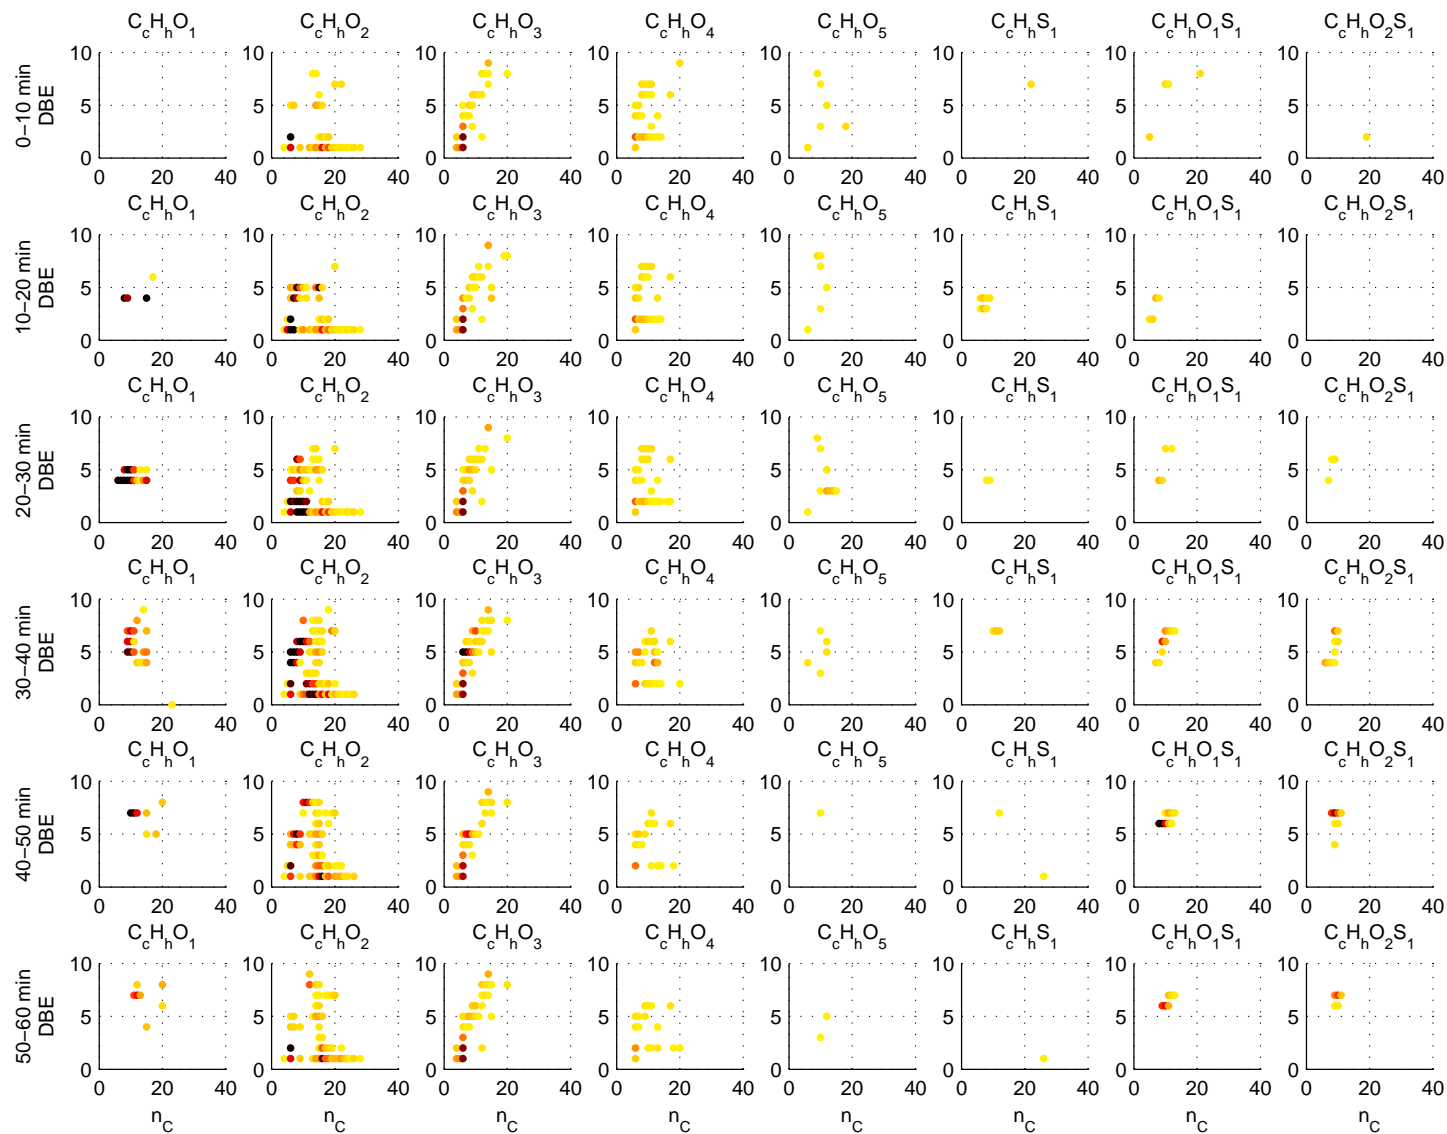

Figure S4.  $n_C$ -DBE- $t$ -plots of different time segments and compound classes.
